# Supplementary material for: A chemically-defined growth medium to support Lactobacillus-Acetobacter sp. community analysis
Source: PubMed Central journal article supplement (PMC10569604; doi:10.1371/journal.pone.0292585), 2023-10-12
Supplement: pone.0292585.s001.pdf [file pone.0292585.s001.pdf]

## Supplemental Materials: A chemically-defined growth medium to support *Lactobacillus-Acetobacter sp.* community analysis.

Kevin Aumiller<sup>1,2</sup> Robert Scheffler<sup>1</sup> Eric T. Stevens<sup>3</sup> Zehra T. Güvener<sup>4</sup> Emily Tung<sup>4</sup> Anna B. Grimaldo<sup>5</sup> Hans K. Carlson<sup>6</sup> Adam M. Deutschbauer<sup>5,6</sup> Michiko E. Taga<sup>5</sup> Maria L. Marco<sup>3</sup> William B. Ludington<sup>1,2\*</sup>

**1** Carnegie Institution of Washington, Department of Embryology, Baltimore, MD 21218, USA **2** Johns Hopkins University, Department of Biology, Baltimore, MD 21218, USA **3** University of California, Davis, Department of Food Science and Technology, Davis, CA 95616, USA

**4** University of California, Berkeley, Molecular and Cell Biology Department, 94720, USA

**5** University of California, Berkeley, Department of Plant and Microbial Biology, 94720, USA

**6** Lawrence Berkeley National Laboratory, Department of Environmental Genomics and Systems Biology, Berkeley, CA 94720, USA

✉ These authors contributed equally to this work.

\* ludington@carnegiescience.edu

## References

1. Savijoki K, Suokko A, Palva A, Varmanen P. New convenient defined media for [35S]methionine labelling and proteomic analyses of probiotic lactobacilli. *Letters in Applied Microbiology*. 2006;42(3):202–209. doi:10.1111/j.1472-765X.2005.01853.x.

**Table 1. Supplemental List of chemicals used in this study**

| <b>Compound</b>                      | <b>Vendor</b>     | <b>Catalog number</b> | <b>Molecular weight</b> |
|--------------------------------------|-------------------|-----------------------|-------------------------|
| MOPS, Free acid, UltraPure           | GoldBio           | M790                  | 209.26                  |
| K <sub>2</sub> HPO <sub>4</sub>      | Fisher Scientific | P288                  | 174.18                  |
| NaCl                                 | Fisher Scientific | S271                  | 58.44                   |
| NH <sub>4</sub> Cl                   | Fisher Scientific | A649                  | 53.49                   |
| K <sub>2</sub> SO <sub>4</sub>       | Sigma             | P9458                 | 174.26                  |
| MgCl <sub>2</sub> ·6H <sub>2</sub> O | Fisher Scientific | BP214                 | 203.31                  |
| MnCl <sub>2</sub> ·4H <sub>2</sub> O | Sigma             | M3634                 | 197.9                   |
| FeSO <sub>4</sub> ·7H <sub>2</sub> O | Sigma             | F8633                 | 278.01                  |
| L-Alanine                            | Sigma             | A7627                 | 89.09                   |
| L-Arginine                           | Sigma             | A5131                 | 210.66                  |
| Glycine                              | Sigma             | G7126                 | 75.07                   |
| L-Lysine                             | Sigma             | L5626                 | 146.19                  |
| L-Proline                            | Sigma             | P0380                 | 115.13                  |
| L-Histidine                          | Sigma             | H8125                 | 155.15                  |
| L-Serine                             | Sigma             | S4500                 | 105.09                  |
| L-Threonine                          | Sigma             | T8625                 | 119.12                  |
| L-Aspartic acid                      | Sigma             | A9256                 | 133.1                   |
| L-Asparagine                         | Sigma             | A0884                 | 132.12                  |
| L-Tyrosine                           | Sigma             | T3754                 | 181.19                  |
| L-Cysteine-HCl                       | Sigma             | C1276                 | 157.62                  |
| L-Valine                             | Sigma             | V0500                 | 117.15                  |
| L-Glutamic acid                      | Sigma             | G1251                 | 183.6                   |
| L-Tryptophane                        | Sigma             | T0254                 | 204.23                  |
| L-Phenylalanine                      | Sigma             | P2126                 | 165.19                  |
| L-Glutamine                          | Sigma             | G3126                 | 146.14                  |
| L-Leucine                            | Sigma             | L8000                 | 131.17                  |
| L-Isoleucine                         | Sigma             | I2752                 | 131.17                  |
| L-Methionine                         | Sigma             | M9625                 | 149.21                  |
| Ca-(D)-(+)-pantothenate              | Sigma             | C8731                 | 238.27                  |
| Lipoic acid                          | Sigma             | T1395                 | 206.33                  |
| Nicotinic acid                       | Sigma             | 72309                 | 123.11                  |
| Para-Aminobenzoic acid               | Sigma             | A9878                 | 137.14                  |
| Pyridoxine-HCl                       | Sigma             | P9755                 | 205.64                  |
| Thiamine-HCl                         | Sigma             | T4625                 | 337.27                  |
| Biotin                               | Sigma             | B4639                 | 244.31                  |
| Ascorbic acid                        | Fisher Scientific | AA3623714             | 176.12                  |
| Folic acid                           | Sigma             | F7876                 | 441.4                   |
| Riboflavin                           | Sigma             | R4500                 | 376.36                  |
| Cyanocobalamin                       | Sigma             | V6629                 | 1355.37                 |
| Guanine                              | Sigma             | G6779                 | 151.13                  |
| Uracil                               | Sigma             | U1128                 | 112.09                  |
| Xanthine                             | Sigma             | X4002                 | 152.11                  |
| Adenine                              | Sigma             | A2786                 | 135.13                  |
| Glucose                              | Sigma             | G8270                 | 180.16                  |
| Fructose                             | Sigma             | F3510                 | 180.16                  |
| Acetate, sodium salt                 | Fisher Scientific | S210                  | 90.08                   |

**Table 2. Supplemental Bacterial strains used in this study**

| <b>Strain</b>                  | <b>Source</b>                                 | <b>Original study</b>      |
|--------------------------------|-----------------------------------------------|----------------------------|
| <i>Lp. plantarum</i> WF        | wild <i>D. melanogaster</i> isolate           | Obadia et al. 2017         |
| <i>Lp. plantarum</i> NC8       | fermented grass                               | Axelsson et al. 2012       |
| <i>Lp. plantarum</i> NCIMB8826 | human saliva                                  | Hayward & Davis 1956       |
| <i>Lp. plantarum</i> ATCC 8014 | food                                          | (Orla-Jensen) Bergey et al |
| <i>Lp. plantarum</i> LF        | Canton-S <i>D. melanogaster</i>               | Obadia et al. 2017         |
| <i>Lp. plantarum</i> endoref   | lab <i>D. melanogaster</i>                    | Storelli et al. 2011       |
| <i>Lp. plantarum</i> SB001     | lab <i>D. melanogaster</i>                    | Obadia et al. 2017         |
| <i>Lp. plantarum</i> SSB       | wild <i>D. melanogaster</i>                   | Hardy et al. 2018          |
| <i>Lp. plantarum</i> WJL       | lab <i>D. melanogaster</i>                    | Ryu et al 2008             |
| <i>Lp. plantarum</i> K4        | wheat sourdough starter                       | Yu et al 2021              |
| <i>Lp. plantarum</i> 8.1       | wheat boza                                    | Yu et al 2021              |
| <i>Lp. plantarum</i> W1.1      | wheat flour teff injera                       | Yu et al 2021              |
| <i>Lp. plantarum</i> B1.1      | brown flour teff injera                       | Yu et al 2021              |
| <i>Lp. plantarum</i> B1.3      | brown flour teff injera                       | Yu et al 2021              |
| <i>Lp. plantarum</i> T2.5      | fermented tomatoes                            | Yu et al 2021              |
| <i>Lp. plantarum</i> WS1.1     | fermented tomatoes (spoiled)                  | Yu et al 2021              |
| <i>Lp. plantarum</i> 1B1       | cactus fruit ( <i>Opuntia ficus-indicia</i> ) | Tyler et al 2016           |
| <i>Lp. plantarum</i> AJ11      | fermented olives                              | Golomb et al 2013          |
| <i>Lp. plantarum</i> BGM55     | fermented olives inoculated with yeast        | Golomb et al 2013          |
| <i>Lp. plantarum</i> BGM37     | olive fermentation brine                      | Golomb et al 2013          |
| <i>Lp. plantarum</i> BGM40     | fermented olives                              | Golomb et al 2013          |
| <i>Lp. plantarum</i> EL11      | fermented olives                              | Golomb et al 2013          |
| <i>Ll. brevis</i> LF           | isolated from lab <i>D. melanogaster</i>      | Gould et al. 2018          |
| <i>Ll. brevis</i> LF2          | isolated from lab <i>D. melanogaster</i>      | Obadia et al. 2017         |
| <i>Ll. brevis</i> SSA          | isolated from wild <i>D. melanogaster</i>     | Hardy et al. 2018          |
| <i>Ll. brevis</i> Di           | isolated from wild <i>D. immigrans</i>        | this study                 |
| <i>A. orientalis</i>           | Canton-S isolate                              | Gould et al. 2018          |
| <i>A. pasteurianus</i> LFM     | Oregon-R isolate                              | Gould et al. 2018          |
| <i>A. pasteurianus</i> SSB     | isolated from lab <i>D. melanogaster</i>      | this study                 |
| <i>A. tropicalis</i>           | Oregon-R isolate                              | Gould et al. 2018          |
| <i>A. cerevisiae</i>           | wild <i>D. melanogaster</i>                   | this study                 |
| <i>A. malorum</i>              | wild <i>D. melanogaster</i>                   | this study                 |

**Table 3. Supplemental** Final growth yield values of strains grown in CDM with indicated fold-difference of the combined amino acids, vitamins, and nucleotides from the concentration of components listed in Table 1.

| <b>Concentration</b> | <b><i>Lp. plantarum</i></b> | <b><i>Ll. brevis</i></b> | <b><i>A. pasteurianus</i></b> | <b><i>A. tropicalis</i></b> |
|----------------------|-----------------------------|--------------------------|-------------------------------|-----------------------------|
| <i>2x</i>            | 0.449 (sem 0.029)           | 0.060 (sem 0.005)        | 0.101 (sem 0.078)             | 0.072 (sem 0.005)           |
| <i>1x</i>            | 0.236 (sem 0.016)           | 0.058 (sem 0.002)        | 0.151 (sem 0.014)             | 0.096 (sem 0.001)           |
| <i>0.5x</i>          | 0.085 (sem 0.009)           | 0.031 (sem 0.001)        | 0.103 (sem 0.004)             | 0.093 (sem 0.004)           |

**Table 4. Supplemental** Growth yield values of strains grown in CDM from [1] with indicated additives at 10-fold excess

| Additive               | <i>Lp. plantarum</i> | <i>Ll. brevis</i>  | <i>A. pasteurianus</i> | <i>A. tropicalis</i> |
|------------------------|----------------------|--------------------|------------------------|----------------------|
| CDM no additives       | 0.238 (sem 0.002)    | 0.131 (sem 0.001)  | 0.103 (sem 0.020)      | 0.036 (sem 0.001)    |
| Ala                    | 0.218 (sem 0.009)    | 0.138 (sem 0.000)  | 0.199 (sem 0.000)      | 0.073 (sem 0.007)    |
| Asn                    | 0.229 (sem 0.019)    | 0.132 (sem 0.005)  | 0.136 (sem 0.112)      | 0.037 (sem 0.006)    |
| Glu                    | 0.317 (sem 0.011)    | 0.071 (sem 0.006)  | 0.030 (sem 0.004)      | 0.049 (sem 0.002)    |
| Phe                    | 0.285 (sem 0.033)    | 0.134 (sem 0.002)  | 0.062 (sem 0.040)      | 0.034 (sem 0.003)    |
| Leu                    | 0.269 (sem 0.109)    | 0.130 (sem 0.002)  | 0.025 (sem 0.003)      | 0.047 (sem 0.004)    |
| Ile                    | 0.228 (sem 0.001)    | 0.135 (sem 0.011)  | 0.064 (sem 0.023)      | 0.036 (sem 0.005)    |
| Met                    | 0.231 (sem 0.002)    | 0.123 (sem 0.000)  | 0.024 (sem 0.041)      | 0.040 (sem 0.001)    |
| Val                    | 0.251 (sem 0.044)    | 0.138 (sem 0.001)  | 0.032 (sem 0.003)      | 0.004 (sem 0.001)    |
| Trp                    | 0.877* (sem 0.535)   | 0.127 (sem 0.004)  | 0.128 (sem 0.059)      | 0.036 (sem 0.003)    |
| Gln                    | 0.287 (sem 0.007)    | 0.076 (sem 0.003)  | 0.000 (sem 0.002)      | 0.039 (sem 0.000)    |
| Arg                    | 0.118 (sem 0.030)    | 0.124 (sem 0.000)  | 0.085 (sem 0.021)      | 0.033 (sem 0.002)    |
| Gly                    | 0.217 (sem 0.005)    | 0.133 (sem 0.000)  | 0.156 (sem 0.040)      | 0.034 (sem 0.000)    |
| Lys                    | 0.213 (sem 0.000)    | 0.141 (sem 0.001)  | 0.099 (sem 0.013)      | 0.041 (sem 0.000)    |
| Pro                    | 0.298 (sem 0.016)    | 0.155 (sem 0.002)  | 0.058 (sem 0.020)      | 0.037 (sem 0.000)    |
| His                    | 0.268 (sem 0.019)    | 0.138 (sem 0.003)  | 0.118 (sem 0.083)      | 0.040 (sem 0.000)    |
| Ser                    | 0.296 (sem 0.008)    | 0.121 (sem 0.007)  | 0.054 (sem 0.002)      | 0.065 (sem 0.032)    |
| Thr                    | 0.257 (sem 0.025)    | 0.140 (sem 0.002)  | 0.046 (sem 0.011)      | 0.032 (sem 0.001)    |
| Panθοthenate           | 0.246 (sem 0.011)    | 0.138 (sem 0.002)  | 0.055 (sem 0.027)      | 0.027 (sem 0.009)    |
| Lipoic acid            | 0.260 (sem 0.010)    | 0.111 (sem 0.004)  | 0.032 (sem 0.005)      | 0.033 (sem 0.000)    |
| Cyanocobalamin         | 0.261 (sem 0.005)    | 0.136 (sem 0.000)  | 0.088 (sem 0.000)      | 0.045 (sem 0.003)    |
| Nicotinic acid         | 0.218 (sem 0.007)    | 0.151 (sem 0.027)  | 0.074 (sem 0.002)      | 0.039 (sem 0.001)    |
| para-Aminobenzoic acid | 0.217 (sem 0.010)    | 0.155 (sem 0.028)  | 0.137 (sem 0.065)      | 0.038 (sem 0.004)    |
| Pyridoxine             | 0.225 (sem 0.000)    | 0.135 (sem 0.001)  | 0.067 (sem 0.007)      | 0.038 (sem 0.004)    |
| Thiamine               | 0.231 (sem 0.012)    | 0.136 (sem 0.001)  | 0.143 (sem 0.051)      | 0.037 (sem 0.000)    |
| Biotin                 | 0.299 (sem 0.009)    | 0.137 (sem 0.005)  | 0.075 (sem 0.002)      | 0.041 (sem 0.000)    |
| Ascorbate              | 0.231 (sem 0.007)    | 0.088 (sem 0.052)  | 0.316# (sem 0.370)     | 0.050 (sem 0.000)    |
| Folate                 | 0.227 (sem 0.010)    | 0.139 (sem 0.001)  | 0.071 (sem 0.009)      | 0.041 (sem 0.000)    |
| Riboflavin             | 0.230 (sem 0.012)    | 0.135 (sem 0.000)  | 0.187 (sem 0.013)      | 0.037 (sem 0.001)    |
| Guanine                | 0.212 (sem 0.004)    | 0.136 (sem 0.000)  | 0.124 (sem 0.035)      | 0.042 (sem 0.005)    |
| Uracil                 | 0.267 (sem 0.000)    | 0.155 (sem 0.004)  | 0.066 (sem 0.019)      | 0.043 (sem 0.003)    |
| Xanthine               | 0.243 (sem 0.007)    | 0.138 (sem 0.002)  | 0.069 (sem 0.018)      | 0.040 (sem 0.003)    |
| Adenine                | 0.252 (sem 0.007)    | 0.133 (sem 0.001)  | 0.055 (sem 0.033)      | 0.044 (sem 0.002)    |
| PO4                    | 0.263 (sem 0.008)    | 0.208 (sem 0.000)  | 0.042 (sem 0.018)      | 0.037 (sem 0.002)    |
| SO4                    | 0.276 (sem 0.074)    | 0.132 (sem 0.000)  | 0.120 (sem 0.081)      | 0.042 (sem 0.001)    |
| NH4                    | 0.200 (sem 0.004)    | 0.159 (sem 0.002)  | 0.040 (sem 0.017)      | 0.036 (sem 0.003)    |
| Mg                     | 0.205 (sem 0.092)    | 0.154 (sem 0.039)  | 0.060 (sem 0.003)      | 0.039 (sem 0.002)    |
| Mn                     | 0.290 (sem 0.008)    | 0.157 (sem 0.003)  | 0.113 (sem 0.029)      | 0.057 (sem 0.020)    |
| Fe                     | 0.210 (sem 0.007)    | 0.157 (sem 0.001)  | 0.120 (sem 0.029)      | 0.042 (sem 0.001)    |
| Na                     | 0.177 (sem 0.032)    | 0.139 (sem 0.001)  | 0.164 (sem 0.085)      | 0.018 (sem 0.000)    |
| Bicarbonate, 40 mM     | 0.347* (sem 0.019)   | 0.0135 (sem 0.001) | 0.022 (sem 0.004)      | 0.038 (sem 0.000)    |

\* confirmed increases *Lp* growth.

# confirmed increases *Ap* growth.

**Table 5. Supplemental** Growth yield values of strains grown in CDM from *Savijoki et al 2006* with indicated carbon sources.

| Strain                 | Gluc 0.65% Fruc 0.65% Acet 0.1% | Gluc 0.65% Fruc 0.65% | Gluc 1% Acet 0.1% | Fruc 1% | Gluc 1% | Acet 0.1% |
|------------------------|---------------------------------|-----------------------|-------------------|---------|---------|-----------|
| <i>Lp. plantarum</i>   | – <sup>1</sup>                  | –                     | 0.123             | –       | 0.056   | 0.001     |
| <i>Ll. brevis</i>      | 0.051                           | 0.026                 | –                 | –       | –       | 0.000     |
| <i>A. pasteurianus</i> | –                               | –                     | –                 | 0.026   | –       | 0.014     |
| <i>A. tropicalis</i>   | –                               | –                     | 0.021             | –       | 0.044   | 0.021     |

1. – indicates condition not tested

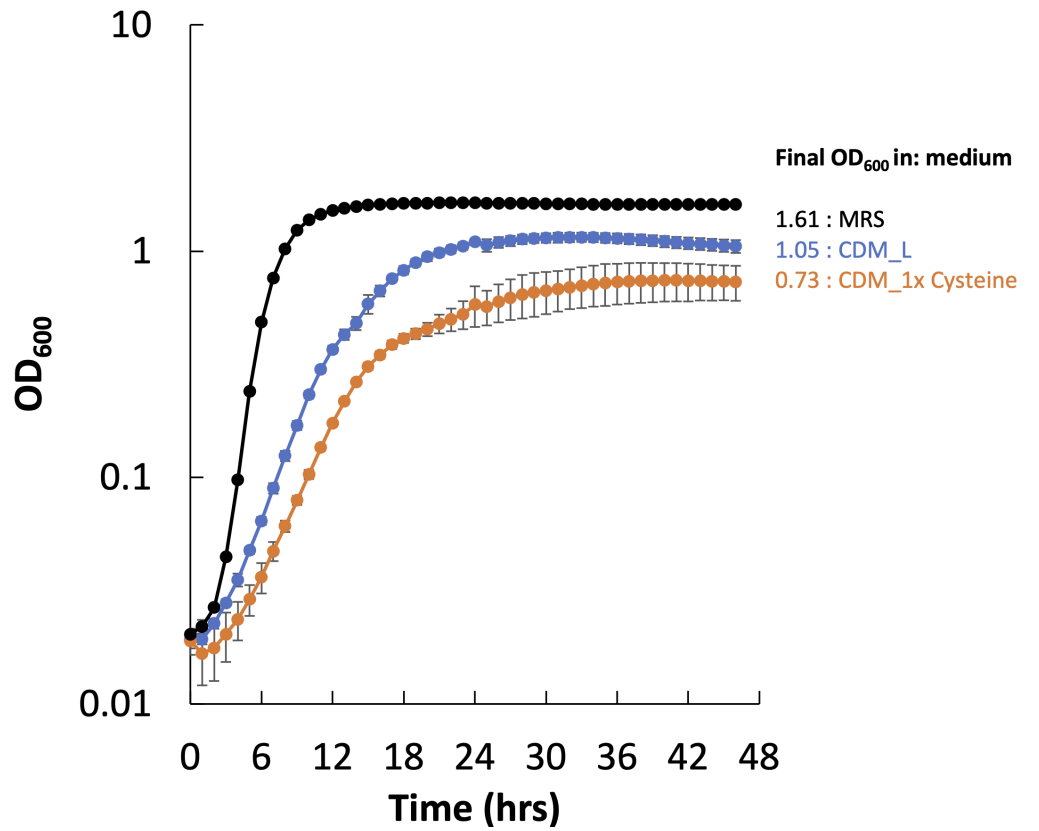

**Fig 1. Supplemental** Growth of *Lp. plantarum* NCIMB8826 in MRS and CDM<sub>L</sub> with different amounts of cysteine. Inoculation at 0.05 OD<sub>600</sub> from overnight cultures of MRS grown cells washed in PBS. Aerobic growth in 96 well plates with continuous shaking 12 technical replicates per growth curve. OD<sub>600</sub> readings each 1 hour. Error bars are standard error. Note that CDM<sub>L</sub> has 10x the cysteine of CDM<sub>L</sub> 1x cysteine.
